# Supplementary material for: Exercise and Nutrition Interventions in Patients with Head and Neck Cancer during Curative Treatment: A Systematic Review and Meta-Analysis
Source: PubMed Central journal article supplement (PMC7690392; doi:10.3390/nu12113233), 2020-10-22
Supplement: nutrients-12-03233-s001.pdf [file nutrients-12-03233-s001.pdf]

**Table S1.** Outcomes and effects of nutritional and exercise interventions, organized according to study type, year of publication and intervention.

| <b>Randomized controlled trials</b> |                          |                                        |                                                   |                                                                                                                                                                                                                                               |
|-------------------------------------|--------------------------|----------------------------------------|---------------------------------------------------|-----------------------------------------------------------------------------------------------------------------------------------------------------------------------------------------------------------------------------------------------|
| <b>Study</b>                        | <b>Intervention type</b> | <b>Selected outcomes</b>               | <b>Measuring methods</b>                          | <b>Between-group finding</b>                                                                                                                                                                                                                  |
| Cereda, 2018                        | Nutrition                | Body composition<br>Physical function  | Total body mass<br>Handgrip dynamometer           | Weight loss (kg) end of RT:<br>Intervention -1.9 vs control -3.5, $p = 0.006$<br>No statistically significant between-group difference                                                                                                        |
| Jiang, 2018                         | Nutrition                | Nutritional status<br>Body composition | PG-SGA<br>Total body mass<br>Fat-free mass by BIA | No statistically significant between-group difference<br>Weight (kg) after adjustment for baseline,<br>End of CRT: Intervention 59.11 vs control 58.14,<br>$F = 4.544, p \leq 0.036$<br>No statistically significant between-group difference |
| Roussel, 2017                       | Nutrition                | Body composition                       | Total body mass<br>BMI                            | No statistically significant between-group differences<br>No statistically significant between-group differences                                                                                                                              |
| Ravasco, 2005                       | Nutrition                | Nutritional status<br>Body composition | PG-SGA<br>Total body mass                         | No between-group differences given<br>No between-group differences given                                                                                                                                                                      |
| Isenring, 2003                      | Nutrition                | Body composition                       | Total body mass<br>Fat-free mass by BIA           | Weight loss (kg) after 3 months:<br>Intervention -1.1 vs control -4.3, $p = 0.019$<br>Fat free mass loss (kg)<br>Intervention -0.3 vs control -2.2, $p = 0.029$                                                                               |
| Hearne, 1989                        | Nutrition                | Body composition                       | Total body mass                                   | Weight loss (%) Nasopharyngeal carcinoma:<br>Intervention 3.8 vs control 3.3 ( <i>ns</i> )<br>All other cancer sites: Intervention 0.2 vs control 7.3,<br>$p = 0.005$                                                                         |

| Daly, 1984                           | Nutrition                                                  | Body composition                                            | Total body mass<br>Mid-arm muscle circumference                                                                     | Weight loss (%) Nasopharyngeal carcinoma:<br>EN 3.5 vs orally fed 5 ( <i>ns</i> ).<br>All other cancer sites: EN 0.6 vs orally 6.1, $p < 0.04$<br>No statistically significant between-group differences                                                                                                                                                 |
|--------------------------------------|------------------------------------------------------------|-------------------------------------------------------------|---------------------------------------------------------------------------------------------------------------------|----------------------------------------------------------------------------------------------------------------------------------------------------------------------------------------------------------------------------------------------------------------------------------------------------------------------------------------------------------|
| Samuel, 2019                         | Exercise                                                   | Physical function                                           | 6-minute walk test                                                                                                  | Change in walking length (meters) after 11 weeks:<br>Intervention + 37 vs control - 73 meters,<br>$F(3,345) = 23.67, p \leq 0.001$                                                                                                                                                                                                                       |
| Samuel, 2013                         | Exercise                                                   | Physical function                                           | 6-minute walk test                                                                                                  | Change in walking length (meters) after 6 weeks:<br>Intervention + 42 vs control - 96 meters, $p \leq 0.001$                                                                                                                                                                                                                                             |
| <b>Pilot and feasibility studies</b> |                                                            |                                                             |                                                                                                                     |                                                                                                                                                                                                                                                                                                                                                          |
| Study                                | Intervention type                                          | Selected outcomes                                           | Measuring methods                                                                                                   | Between-group finding                                                                                                                                                                                                                                                                                                                                    |
| Sandmæl, 2017                        | Exercise and nutrition                                     | Body composition                                            | Total body mass (CT)<br>Skeletal muscle mass                                                                        | No statistically significant between-group differences<br>No statistically significant between-group differences                                                                                                                                                                                                                                         |
| Zhao, 2016                           | Exercise and nutrition                                     | Body composition<br>Physical function                       | BMI<br>Lean body mass (DXA)<br>Handgrip dynamometer<br>6-minute walk<br>Timed up and go                             | No statistically significant between-group differences<br>No statistically significant between-group differences<br>No statistically significant between-group differences<br>No statistically significant between-group differences<br>No statistically significant between-group differences                                                           |
| Capozzi, 2016                        | Lifestyle intervention including<br>Exercise and nutrition | Nutritional status<br>Body composition<br>Physical function | PG-SGA<br>Total body mass<br>Lean body mass<br>Handgrip dynamometer<br>6-minute walk test<br>30-second sit to stand | No statistically significant between-group differences<br>No statistically significant between-group differences |

---

|              |                        |                                       |                                                                              |                                                                                                                                                                                                                                                                     |
|--------------|------------------------|---------------------------------------|------------------------------------------------------------------------------|---------------------------------------------------------------------------------------------------------------------------------------------------------------------------------------------------------------------------------------------------------------------|
| Rogers, 2013 | Exercise and nutrition | Body composition<br>Physical function | BMI<br>Lean body mass by BIA<br>Handgrip dynamometer<br>5 times sit to stand | Change (kg/m <sup>2</sup> ) after 6 weeks:<br>Interv -1.4 vs control -1.1, $p < 0.05$<br>No statistically significant between-group differences<br>No statistically significant between-group differences<br>No statistically significant between-group differences |
|--------------|------------------------|---------------------------------------|------------------------------------------------------------------------------|---------------------------------------------------------------------------------------------------------------------------------------------------------------------------------------------------------------------------------------------------------------------|

---

Supplementary Figure.

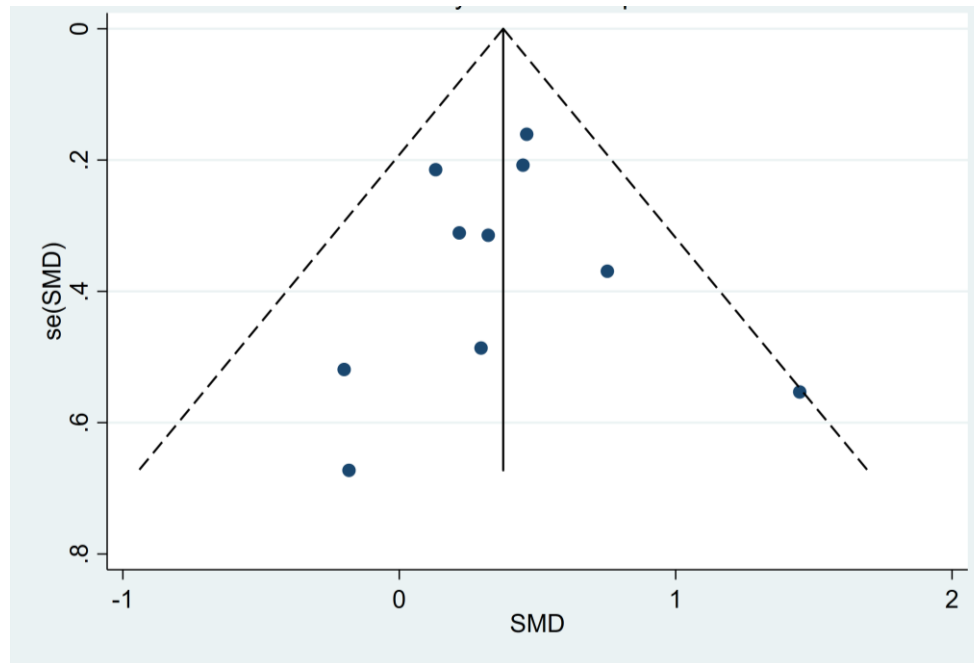

Figure S1. The symmetry of body composition results presented in Funnel plot.

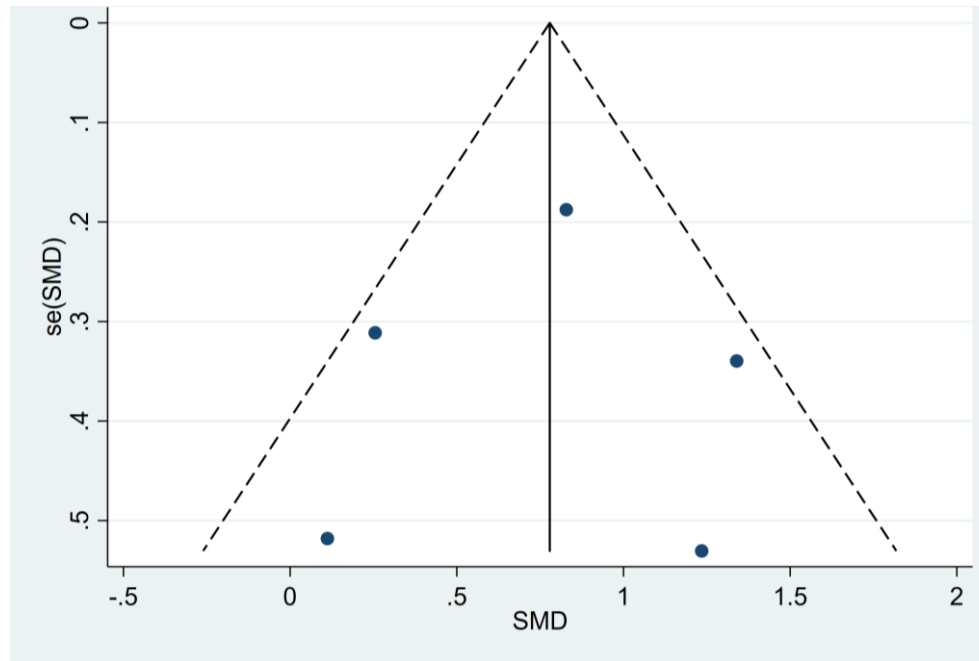

**Figure S2.** The symmetry of physical function results presented in Funnel plot.
